# Supplementary material
Source: Royal Society of Chemistry journal article supplement (doi:10.1039/d5fo04976h)

## **Modulation and adaptation of gut microbial metabolic functions under probiotic and postbiotic treatment using a novel *in vitro* anaerobic pseudo-colon system**

Nehal<sup>1</sup>, Prangya Ranjan Rout<sup>2</sup>, Priyankar Dey<sup>1\*</sup>

<sup>1</sup> Department of Biotechnology, Thapar Institute of Engineering and Technology, Patiala 147004, Punjab, India

<sup>2</sup> Department of Biotechnology, Dr. B.R. Ambedkar National Institute of Technology, Jalandhar, India

\*Corresponding author

Email: [priyankar.dey@thapar.edu](mailto:priyankar.dey@thapar.edu); [priyankardey28@gmail.com](mailto:priyankardey28@gmail.com)

Mob: +91-9064275660

**Supplementary Table 1:** Characteristics of the fecal matter donor

| Category                          | Features    |
|-----------------------------------|-------------|
| Age                               | 20-40       |
| Sex                               | Male/Female |
| Type of diet                      | Vegetarian  |
| Antibiotic usage history          | >12 months  |
| Dietary fiber intake              | No          |
| Probiotic intake                  | No          |
| Western diet                      | Yes         |
| Smoking                           | No          |
| Drinking                          | No          |
| Medical history                   | No          |
| Family history of chronic disease | No          |
| Diarrhea history                  | No          |
| Physical activity                 | Yes         |

**Supplementary Table 2:** List of common phyla identified under various treatments.

| Treatment                                  | Total | Phylum                                                    |
|--------------------------------------------|-------|-----------------------------------------------------------|
| Control, butyrate, and <i>L. plantarum</i> | 4     | Actinobacteria, Proteobacteria, Bacteroidetes, Firmicutes |
| <i>L. plantarum</i>                        | 1     | Tenericutes                                               |

**Supplementary Table 3:** List of common orders identified under various treatments.

| Treatment                                  | Total | Orders                                                                                                                                                                                                             |
|--------------------------------------------|-------|--------------------------------------------------------------------------------------------------------------------------------------------------------------------------------------------------------------------|
| Control, butyrate, and <i>L. plantarum</i> | 13    | Acidaminococcales, Clostridiales, Bacillales, Alteromonadales, Tissierellales, Enterobacterales, Veillonellales, Selenomonadales, Eggerthellales, Lactobacillales, Bifidobacteriales, Bacteroidales, Micrococcales |
| Control and butyrate                       | 2     | Burkholderiales, Pseudomonadales                                                                                                                                                                                   |
| Butyrate and <i>L. plantarum</i>           | 5     | Desulfovibrionales, Coriobacteriales, Vibrionales, Streptomycetales, Thiotrichales                                                                                                                                 |
| Control                                    | 2     | Rhodocyclales, Rickettsiales                                                                                                                                                                                       |
| Butyrate                                   | 8     | Sphingomonadales, Erysipelotrichales, Rhizobiales, Haloplasmatales, Marinilabiliales, Chromatiales, Rhodobacterales, Oceanospirillales                                                                             |
| <i>L. plantarum</i>                        | 7     | Aeromonadales, Corynebacteriales, Neisseriales, Chitinophagales, Flavobacteriales, Myxococcales, Acholeplasmatales                                                                                                 |

**Supplementary Table 4:** List of common genera identified under various treatments.

| Treatment                                  | Total | Genera                                                                                                                                                                                                                                                                                                                                                                              |
|--------------------------------------------|-------|-------------------------------------------------------------------------------------------------------------------------------------------------------------------------------------------------------------------------------------------------------------------------------------------------------------------------------------------------------------------------------------|
| Control, butyrate, and <i>L. plantarum</i> | 41    | <i>Dorea</i> , <i>Lactonifactor</i> , <i>Enterococcus</i> , <i>Shigella</i> , <i>Marseillibacter</i> , <i>Clostridium</i> , <i>Escherichia</i> , <i>Dialister</i> , <i>Coprococcus</i> , <i>Oscillibacter</i> , <i>Alistipes</i> , <i>Eubacterium</i> , <i>Bacillus</i> , <i>Citrobacter</i> , <i>Blautia</i> , <i>Bifidobacterium</i> , <i>Anaerococcus</i> , <i>Cronobacter</i> , |

|                                  |    |                                                                                                                                                                                                                                                                                                                                                                                                                                                                                                                                                                                                                                                                                                                                                                                               |
|----------------------------------|----|-----------------------------------------------------------------------------------------------------------------------------------------------------------------------------------------------------------------------------------------------------------------------------------------------------------------------------------------------------------------------------------------------------------------------------------------------------------------------------------------------------------------------------------------------------------------------------------------------------------------------------------------------------------------------------------------------------------------------------------------------------------------------------------------------|
|                                  |    | <i>Salmonella, Oscillospira, Lachnoclostridium, Roseburia, Acidaminococcus, Megasphaera, Serratia, Gemmiger, Ruthenibacterium, Prevotella, Bacteroides, Intestinimonas, Eggerthella, Parabacteroides, Anaerofustis, Pantoea, Ruminococcus, Faecalibacterium, Tyzzerella, Mitsuokella, Klebsiella, Enterobacter, Lactobacillus</i>                                                                                                                                                                                                                                                                                                                                                                                                                                                             |
| Control and butyrate             | 9  | <i>Flintibacter, Mobilitalea, Tissierella, Dakarella, Christensenella, Peptoniphilus, Lactococcus, Lachnospira, Parasutterella</i>                                                                                                                                                                                                                                                                                                                                                                                                                                                                                                                                                                                                                                                            |
| Control and <i>L. plantarum</i>  | 5  | <i>Streptococcus, Yersinia, Butyrivibrio, Averyella, Odoribacter</i>                                                                                                                                                                                                                                                                                                                                                                                                                                                                                                                                                                                                                                                                                                                          |
| Butyrate and <i>L. plantarum</i> | 6  | <i>Raoultella, Erwinia, Collinsella, Streptomyces, Butyricoccus, Alkaliphilus</i>                                                                                                                                                                                                                                                                                                                                                                                                                                                                                                                                                                                                                                                                                                             |
| Control                          | 20 | <i>Orientia, Vagococcus, Acetivibrio, Tatumella, Psychrobacter, Leuconostoc, Anaerocolumna, Lonsdalea, Dickeya, Candidatus Azobacteroides, Subdoligranulum, Kluyvera, Listeria, Siccibacter, Macrococcus, Weissella, Pectobacterium, Alicyclobacillus, Desulfuribacillus, Tetrigenococcus</i>                                                                                                                                                                                                                                                                                                                                                                                                                                                                                                 |
| Butyrate                         | 52 | <i>Pseudoflavonifractor, Hespellia, Facklamia, Pseudomonas, Romboutsia, Oxalobacter, Cohnella, Ruminiclostridium, Catabacter, Natranaerovirga, Thermophagus, Neofamilia, Asaccharospora, Murimonas, Microbacterium, Bittarella, Arsenophonus, Finegoldia, Kocuria, Haloplasma, Anaerostipes, Colwellia, Dielma, Flavonifractor, Intestinibacter, Desulfovibrio, Hydrogenoanaerobacterium, Xenorhabdus, Halomonas, Erysipelatoclostridium, Morganella, Anaeromassilibacillus, Keratinibaculum, Proteus, Negativicoccus, Clostridioides, Eisenbergiella, Rhodopseudomonas, Sodalis, Gordonibacter, Bilophila, Paeniclostridium, Anaerotaenia, Peptostreptococcus, Clostridiisalibacter, Lagierella, Thioalkalicoccus, Anaerofilum, Dysgonomonas, Anaerotruncus, Psychrobium, Porphyromonas,</i> |
| <i>L. plantarum</i>              | 12 | <i>Pseudobutyrvibrio, Micrococcus, Angelakisella, Candidatus Phytoplasma, Rahnella, Veillonella, Anaeromyxobacter, Gordonia, Aeromonas, Vibrio, Cellulosilyticum, Peptoclostridium</i>                                                                                                                                                                                                                                                                                                                                                                                                                                                                                                                                                                                                        |

**Supplementary Table 5:** List of metabolites identified in Control.

| S. No. | Name of compounds            | Mol. Formula                                                     | Mol. Wt. | RT (min) | Abundance (%) | Probability |
|--------|------------------------------|------------------------------------------------------------------|----------|----------|---------------|-------------|
| 1      | 2,3-Hexanediol               | C <sub>6</sub> H <sub>14</sub> O <sub>2</sub>                    | 118.17   | 7.924    | 0.060         | 26.2        |
| 2      | 1,2-Pentanediol              | C <sub>5</sub> H <sub>12</sub> O <sub>2</sub>                    | 104.15   | 8.0302   | 0.070         | 23.1        |
| 3      | Methylmalonic acid           | C <sub>4</sub> H <sub>6</sub> O <sub>4</sub>                     | 118.09   | 8.1011   | 0.904         | 29.4        |
| 4      | 2-Methyl-3-hexanol           | C <sub>7</sub> H <sub>16</sub> O                                 | 116.20   | 8.16     | 1.446         | 24.7        |
| 5      | Phenylacetyl glycine         | C <sub>10</sub> H <sub>11</sub> NO <sub>3</sub>                  | 193.20   | 8.3648   | 0.071         | 44.1        |
| 6      | Glu-Gly                      | C <sub>7</sub> H <sub>12</sub> N <sub>2</sub> O <sub>5</sub>     | 204.18   | 21.6791  | 0.087         | 9.03        |
| 7      | 2-Butanol                    | C <sub>4</sub> H <sub>10</sub> O                                 | 74.12    | 21.6989  | 0.123         | 26.5        |
| 8      | Octanoic acid                | C <sub>8</sub> H <sub>16</sub> O <sub>2</sub>                    | 144.21   | 21.7553  | 53.851        | 74.6        |
| 9      | Nonanoic acid                | C <sub>9</sub> H <sub>18</sub> O <sub>2</sub>                    | 158.24   | 24.4351  | 0.205         | 44.5        |
| 10     | Indole                       | C <sub>8</sub> H <sub>7</sub> N                                  | 117.15   | 27.0348  | 8.677         | 22.5        |
| 11     | Capric acid                  | C <sub>10</sub> H <sub>20</sub> O <sub>2</sub>                   | 172.26   | 27.1154  | 28.618        | 73.9        |
| 12     | L-Saccharopine               | C <sub>11</sub> H <sub>20</sub> N <sub>2</sub> O <sub>6</sub>    | 276.29   | 32.0619  | 0.193         | 50          |
| 13     | Myristic acid                | C <sub>14</sub> H <sub>28</sub> O <sub>2</sub>                   | 228.37   | 36.2736  | 3.578         | 42.7        |
| 14     | Octadecanamide               | C <sub>18</sub> H <sub>37</sub> NO                               | 283.5    | 36.3335  | 0.230         | 34.9        |
| 15     | DL-Phenylalanine             | C <sub>9</sub> H <sub>11</sub> NO <sub>2</sub>                   | 165.19   | 43.5152  | 0.044         | 12.2        |
| 16     | Indole-3-lactic acid         | C <sub>11</sub> H <sub>11</sub> NO <sub>3</sub>                  | 205.21   | 46.5729  | 0.033         | 27.9        |
| 17     | Fumaric acid                 | C <sub>4</sub> H <sub>4</sub> O <sub>4</sub>                     | 116.07   | 47.1228  | 0.022         | 42.2        |
| 18     | Trp-His                      | C <sub>17</sub> H <sub>19</sub> N <sub>5</sub> O <sub>3</sub>    | 341.4    | 47.4081  | 0.033         | 50.5        |
| 19     | Homovanillic acid            | C <sub>9</sub> H <sub>10</sub> O <sub>4</sub>                    | 182.17   | 47.913   | 0.026         | 23.6        |
| 20     | Thr-Tyr                      | C <sub>13</sub> H <sub>18</sub> N <sub>2</sub> O <sub>5</sub>    | 282.29   | 48.2163  | 0.063         | 17.2        |
| 21     | Thymidine-5'-phosphate       | C <sub>10</sub> H <sub>15</sub> N <sub>2</sub> O <sub>8</sub> P  | 322.21   | 48.6118  | 0.027         | 69.1        |
| 22     | Nonadecanoic acid            | C <sub>19</sub> H <sub>38</sub> O <sub>2</sub>                   | 298.5    | 48.8573  | 0.043         | 29.5        |
| 23     | Isobutylamine                | C <sub>4</sub> H <sub>11</sub> N                                 | 73.14    | 49.0322  | 0.050         | 25.7        |
| 24     | Arg-Leu-Lys                  | C <sub>18</sub> H <sub>37</sub> N <sub>7</sub> O <sub>4</sub>    | 415.5    | 49.8728  | 0.090         | 61          |
| 25     | Gln-Arg-Arg                  | C <sub>17</sub> H <sub>34</sub> N <sub>10</sub> O <sub>5</sub>   | 458.5    | 50.0658  | 0.074         | 80.4        |
| 26     | α-D-Glucose 1,6-bisphosphate | C <sub>6</sub> H <sub>14</sub> O <sub>12</sub> P <sub>2</sub>    | 340.12   | 50.3915  | 0.053         | 63.5        |
| 27     | Cys-Ser                      | C <sub>6</sub> H <sub>12</sub> N <sub>2</sub> O <sub>4</sub> S   | 208.24   | 50.6495  | 0.078         | 47.4        |
| 28     | D-Lyxose                     | C <sub>5</sub> H <sub>10</sub> O <sub>5</sub>                    | 150.13   | 50.9484  | 0.061         | 70          |
| 29     | Asn-Asn-Lys                  | C <sub>14</sub> H <sub>26</sub> N <sub>6</sub> O <sub>6</sub>    | 374.39   | 51.1268  | 0.109         | 20.8        |
| 30     | Urea                         | CH <sub>4</sub> N <sub>2</sub> O                                 | 60.056   | 51.32    | 0.040         | 34.4        |
| 31     | D-Galactose                  | C <sub>6</sub> H <sub>12</sub> O <sub>6</sub>                    | 180.16   | 51.626   | 0.098         | 56.5        |
| 32     | Enterodiol                   | C <sub>18</sub> H <sub>22</sub> O <sub>4</sub>                   | 302.4    | 51.7081  | 0.037         | 36.8        |
| 33     | 2-Furoic acid                | C <sub>5</sub> H <sub>4</sub> O <sub>3</sub>                     | 112.08   | 51.7661  | 0.049         | 32.4        |
| 34     | Lys-Leu                      | C <sub>12</sub> H <sub>25</sub> N <sub>3</sub> O <sub>3</sub>    | 259.35   | 53.1088  | 0.057         | 15.1        |
| 35     | Met(O)-Val-Arg               | C <sub>16</sub> H <sub>32</sub> N <sub>6</sub> O <sub>5</sub> S  | 420.5    | 53.3107  | 0.134         | 14.7        |
| 36     | N2,N2-Dimethylguanaine       | C <sub>7</sub> H <sub>9</sub> N <sub>5</sub> O                   | 179.18   | 53.686   | 0.061         | 16.1        |
| 37     | Phe-gly                      | C <sub>11</sub> H <sub>14</sub> N <sub>2</sub> O <sub>3</sub>    | 222.24   | 53.8849  | 0.049         | 26.7        |
| 38     | Ile-Pro-Lys                  | C <sub>17</sub> H <sub>32</sub> N <sub>4</sub> O <sub>4</sub>    | 356.5    | 54.3381  | 0.064         | 16.6        |
| 39     | Phosphoramidon               | C <sub>23</sub> H <sub>34</sub> N <sub>3</sub> O <sub>10</sub> P | 543.5    | 54.8336  | 0.048         | 17.7        |
| 40     | Trp-glu                      | C <sub>16</sub> H <sub>19</sub> N <sub>3</sub> O <sub>5</sub>    | 333.34   | 54.998   | 0.142         | 74.5        |
| 41     | Trp-Ile                      | C <sub>17</sub> H <sub>23</sub> N <sub>3</sub> O <sub>3</sub>    | 317.4    | 55.8552  | 0.153         | 49          |
| 42     | Stearic acid                 | C <sub>18</sub> H <sub>36</sub> O <sub>2</sub>                   | 284.5    | 55.9046  | 0.026         | 24.9        |
| 43     | beta-Lactose                 | C <sub>12</sub> H <sub>22</sub> O <sub>11</sub>                  | 342.30   | 56.9592  | 0.073         | 48.8        |
| 44     | Riboflavin                   | C <sub>17</sub> H <sub>20</sub> N <sub>4</sub> O <sub>6</sub>    | 376.4    | 57.6106  | 0.052         | 37.4        |

**Supplementary Table 6:** List of metabolites identified in Butyrate treatment.

| S. No. | Name of compounds    | Mol. Formula                                                    | Mol. Wt. | RT (min) | Abundance (%) | Probability |
|--------|----------------------|-----------------------------------------------------------------|----------|----------|---------------|-------------|
| 1      | N-acetylglycinamide  | C <sub>9</sub> H <sub>9</sub> NO <sub>3</sub>                   | 179.17   | 7.6555   | 0.077         | 28.5        |
| 2      | 1-Octanol            | C <sub>8</sub> H <sub>18</sub> O                                | 130.23   | 7.7225   | 0.032         | 12.6        |
| 3      | 2,3-Hexanediol       | C <sub>6</sub> H <sub>14</sub> O <sub>2</sub>                   | 118.17   | 7.7389   | 0.182         | 36.8        |
| 4      | Thr-Leu              | C <sub>10</sub> H <sub>20</sub> N <sub>2</sub> O <sub>4</sub>   | 232.28   | 7.8204   | 0.198         | 27.1        |
| 5      | Propionamide         | C <sub>3</sub> H <sub>7</sub> NO                                | 73.09    | 7.8518   | 0.084         | 45.1        |
| 6      | N-acetylputrescine   | C <sub>6</sub> H <sub>14</sub> N <sub>2</sub> O                 | 130.19   | 8.0494   | 0.129         | 64          |
| 7      | Methylmalonic acid   | C <sub>4</sub> H <sub>6</sub> O <sub>4</sub>                    | 118.09   | 8.2637   | 0.564         | 70.2        |
| 8      | Phenylacetyl glycine | C <sub>10</sub> H <sub>11</sub> NO <sub>3</sub>                 | 193.20   | 8.3053   | 0.042         | 44.5        |
| 9      | 2-Methyl-3-hexanol   | C <sub>7</sub> H <sub>16</sub> O                                | 116.20   | 8.3401   | 0.339         | 24.3        |
| 10     | 4-Methylbenzoic acid | C <sub>8</sub> H <sub>8</sub> O <sub>2</sub>                    | 136.15   | 8.4808   | 0.021         | 14.4        |
| 11     | Hydroxyacetone       | C <sub>3</sub> H <sub>6</sub> O <sub>2</sub>                    | 74.08    | 10.0918  | 0.074         | 29.3        |
| 12     | Valeric acid         | C <sub>5</sub> H <sub>10</sub> O <sub>2</sub>                   | 102.13   | 14.2926  | 10.493        | 23.5        |
| 13     | Caproic acid         | C <sub>6</sub> H <sub>12</sub> O <sub>2</sub>                   | 116.16   | 15.4717  | 0.139         | 55.1        |
| 14     | Propan-1-one         | C <sub>3</sub> H <sub>5</sub> O                                 | 57.07    | 18.1136  | 0.423         | 42.7        |
| 15     | Octanoic acid        | C <sub>8</sub> H <sub>16</sub> O <sub>2</sub>                   | 144.21   | 21.607   | 48.360        | 74          |
| 16     | Nonanoic acid        | C <sub>9</sub> H <sub>18</sub> O <sub>2</sub>                   | 158.24   | 24.3185  | 0.319         | 43.2        |
| 17     | Lys-Met              | C <sub>11</sub> H <sub>23</sub> N <sub>3</sub> O <sub>3</sub> S | 277.39   | 26.8983  | 0.032         | 29.1        |
| 18     | Indole               | C <sub>8</sub> H <sub>7</sub> N                                 | 117.15   | 26.9175  | 11.486        | 25.7        |
| 19     | Capric acid          | C <sub>10</sub> H <sub>20</sub> O <sub>2</sub>                  | 172.26   | 26.9832  | 25.021        | 49.6        |
| 20     | Isoleucyl-Arginine   | C <sub>12</sub> H <sub>25</sub> N <sub>5</sub> O <sub>3</sub>   | 287.36   | 31.8084  | 0.051         | 76.7        |
| 21     | L-Saccharopine       | C <sub>11</sub> H <sub>20</sub> N <sub>2</sub> O <sub>6</sub>   | 276.29   | 31.9405  | 0.454         | 35.8        |
| 22     | 3-Phenylpropylamine  | C <sub>9</sub> H <sub>13</sub> N                                | 135.21   | 36.1169  | 0.033         | 26.3        |
| 23     | Octadecanamide       | C <sub>18</sub> H <sub>37</sub> NO                              | 283.5    | 36.2266  | 0.254         | 67          |
| 24     | Palmitic acid        | C <sub>16</sub> H <sub>32</sub> O <sub>2</sub>                  | 256.42   | 40.1035  | 0.107         | 39          |
| 25     | Methyl propionate    | C <sub>4</sub> H <sub>8</sub> O <sub>2</sub>                    | 88.11    | 46.1293  | 0.054         | 30.7        |
| 26     | Homogentisic acid    | C <sub>8</sub> H <sub>8</sub> O <sub>4</sub>                    | 168.15   | 48.6986  | 0.078         | 33.6        |
| 27     | alpha-D-Ribofuranose | C <sub>5</sub> H <sub>10</sub> O <sub>5</sub>                   | 150.13   | 49.0306  | 0.061         | 15.7        |
| 28     | Urea                 | CH <sub>4</sub> N <sub>2</sub> O                                | 60.056   | 50.4521  | 0.213         | 20.8        |
| 29     | Ethanol              | C <sub>2</sub> H <sub>6</sub> O                                 | 46.07    | 51.2717  | 0.057         | 21.3        |
| 30     | Methyl acetate       | C <sub>3</sub> H <sub>6</sub> O <sub>2</sub>                    | 74.08    | 52.718   | 0.133         | 17.8        |
| 31     | Acetophenone         | C <sub>8</sub> H <sub>8</sub> O                                 | 120.15   | 52.8678  | 0.082         | 5.37        |
| 32     | p-Cresol             | C <sub>7</sub> H <sub>8</sub> O                                 | 108.14   | 53.1454  | 0.052         | 11.3        |
| 33     | Pyrazine             | C <sub>4</sub> H <sub>4</sub> N <sub>2</sub>                    | 80.09    | 53.3875  | 0.025         | 8.04        |
| 34     | 2-Nitrobutane        | C <sub>4</sub> H <sub>9</sub> NO <sub>2</sub>                   | 103.12   | 53.5019  | 0.092         | 29.7        |
| 35     | Homovanillic acid    | C <sub>9</sub> H <sub>10</sub> O <sub>4</sub>                   | 182.17   | 54.0746  | 0.061         | 7.07        |
| 36     | Trp-Ile              | C <sub>17</sub> H <sub>23</sub> N <sub>3</sub> O <sub>3</sub>   | 317.4    | 55.0232  | 0.030         | 49          |
| 37     | D-Galactose          | C <sub>6</sub> H <sub>12</sub> O <sub>6</sub>                   | 180.16   | 55.5676  | 0.040         | 13.9        |
| 38     | Stearic acid         | C <sub>18</sub> H <sub>36</sub> O <sub>2</sub>                  | 284.5    | 57.4794  | 0.058         | 23.7        |
| 39     | Ethyl heptanoate     | C <sub>9</sub> H <sub>18</sub> O <sub>2</sub>                   | 158.24   | 57.5556  | 0.051         | 7.58        |

**Supplementary Table 7:** List of metabolites identified in *L. plantarum* treatment.

| S. No. | Name of compounds               | Mol. Formula                                                    | Mol. Wt. | RT (min) | Abundance (%) | Probability |
|--------|---------------------------------|-----------------------------------------------------------------|----------|----------|---------------|-------------|
| 1      | Betaine                         | C <sub>5</sub> H <sub>11</sub> NO <sub>2</sub>                  | 117.15   | 4.1793   | 0.024         | 28.8        |
| 2      | DL-Ethionine                    | C <sub>6</sub> H <sub>13</sub> NO <sub>2</sub> S                | 163.24   | 4.2122   | 0.022         | 40.1        |
| 3      | Alanine                         | C <sub>3</sub> H <sub>7</sub> NO <sub>2</sub>                   | 89.09    | 4.2458   | 0.036         | 73.6        |
| 4      | Methyl pyrimidine-5-carboxylate | C <sub>6</sub> H <sub>6</sub> N <sub>2</sub> O <sub>2</sub>     | 138.12   | 4.2656   | 0.022         | 11.9        |
| 5      | Homovanillic acid               | C <sub>9</sub> H <sub>10</sub> O <sub>4</sub>                   | 182.17   | 5.2206   | 0.109         | 28.2        |
| 6      | Lysine                          | C <sub>6</sub> H <sub>14</sub> N <sub>2</sub> O <sub>2</sub>    | 146.19   | 5.4636   | 0.025         | 72.3        |
| 7      | Uridine                         | C <sub>9</sub> H <sub>12</sub> N <sub>2</sub> O <sub>6</sub>    | 244.20   | 5.7022   | 0.043         | 27.3        |
| 8      | 2-Hydroxypyridine               | C <sub>5</sub> H <sub>5</sub> NO                                | 95.1     | 6.1698   | 0.118         | 51.1        |
| 9      | Methylguanidine                 | C <sub>2</sub> H <sub>7</sub> N <sub>3</sub>                    | 73.1     | 7.833    | 0.037         | 27.3        |
| 10     | Phenylacetyl glycine            | C <sub>10</sub> H <sub>11</sub> NO <sub>3</sub>                 | 193.2    | 8.1402   | 0.049         | 47.7        |
| 11     | Methanesulfonic acid            | CH <sub>4</sub> O <sub>3</sub> S                                | 96.11    | 8.5056   | 0.048         | 28          |
| 12     | Indole-3-carboxylic acid        | C <sub>9</sub> H <sub>7</sub> NO <sub>2</sub>                   | 161.16   | 18.1573  | 0.420         | 21.5        |
| 13     | Octanoic acid                   | C <sub>8</sub> H <sub>16</sub> O <sub>2</sub>                   | 144.21   | 21.6176  | 53.794        | 72.5        |
| 14     | Indole                          | C <sub>8</sub> H <sub>7</sub> N                                 | 117.15   | 23.5046  | 1.584         | 35.6        |
| 15     | Nonanoic acid                   | C <sub>9</sub> H <sub>18</sub> O <sub>2</sub>                   | 158.24   | 24.3247  | 0.340         | 48.1        |
| 16     | Capric acid                     | C <sub>10</sub> H <sub>20</sub> O <sub>2</sub>                  | 172.26   | 26.9902  | 28.224        | 69.9        |
| 17     | Gln-Glu                         | C <sub>10</sub> H <sub>17</sub> N <sub>3</sub> O <sub>6</sub>   | 275.26   | 31.8192  | 6.991         | 63.8        |
| 18     | Methyl 2-methylprop-2-enoate    | C <sub>9</sub> H <sub>14</sub> O <sub>4</sub>                   | 186.2    | 31.8298  | 0.046         | 8.26        |
| 19     | Nonane                          | C <sub>9</sub> H <sub>20</sub>                                  | 128.25   | 31.8862  | 0.437         | 25.5        |
| 20     | 2-Isopropylmalic acid           | C <sub>7</sub> H <sub>12</sub> O <sub>5</sub>                   | 176.17   | 31.9143  | 0.119         | 14.7        |
| 21     | Palmitic acid                   | C <sub>16</sub> H <sub>32</sub> O <sub>2</sub>                  | 256.42   | 40.1122  | 0.417         | 20.4        |
| 22     | 3-Methyl-2-pentenedioic acid    | C <sub>6</sub> H <sub>8</sub> O <sub>4</sub>                    | 144.12   | 42.9318  | 0.224         | 18.3        |
| 23     | 9-Octadecenoic acid             | C <sub>18</sub> H <sub>34</sub> O <sub>2</sub>                  | 282.5    | 43.3253  | 0.255         | 10.6        |
| 24     | Myristic acid                   | C <sub>14</sub> H <sub>28</sub> O <sub>2</sub>                  | 228.37   | 46.165   | 0.061         | 42.5        |
| 25     | Cinnamic acid                   | C <sub>9</sub> H <sub>8</sub> O <sub>2</sub>                    | 148.16   | 47.0509  | 0.033         | 5.2         |
| 26     | Pyridine                        | C <sub>5</sub> H <sub>5</sub> N                                 | 79.1     | 47.7396  | 0.096         | 13.4        |
| 27     | Met(O)-Val-Arg                  | C <sub>16</sub> H <sub>32</sub> N <sub>6</sub> O <sub>5</sub> S | 420.5    | 48.1956  | 0.041         | 11.1        |
| 28     | Lys-Cys-Lys                     | C <sub>15</sub> H <sub>31</sub> N <sub>5</sub> O <sub>4</sub> S | 377.5    | 48.4125  | 0.056         | 29.7        |
| 29     | Propylamine                     | C <sub>3</sub> H <sub>9</sub> N                                 | 59.11    | 49.0277  | 0.041         | 8.41        |
| 30     | D-Galactose                     | C <sub>6</sub> H <sub>12</sub> O <sub>6</sub>                   | 180.16   | 49.4444  | 0.079         | 45.5        |
| 31     | Methyl propionate               | C <sub>4</sub> H <sub>8</sub> O <sub>2</sub>                    | 88.11    | 49.7088  | 0.042         | 62.5        |
| 32     | Tyr-Ala                         | C <sub>12</sub> H <sub>16</sub> N <sub>2</sub> O <sub>4</sub>   | 252.27   | 50.2452  | 0.070         | 20          |
| 33     | Methyl phenylacetate            | C <sub>9</sub> H <sub>10</sub> O <sub>2</sub>                   | 150.17   | 50.5284  | 0.146         | 11.2        |
| 34     | Propan-1-one                    | C <sub>3</sub> H <sub>5</sub> O                                 | 57.07    | 50.5679  | 0.210         | 11.6        |
| 35     | Leucine                         | C <sub>6</sub> H <sub>13</sub> NO <sub>2</sub>                  | 131.17   | 50.7106  | 0.053         | 14.4        |
| 36     | Arginine                        | C <sub>6</sub> H <sub>14</sub> N <sub>4</sub> O <sub>2</sub>    | 174.2    | 50.8919  | 0.031         | 8.33        |
| 37     | Octadecane                      | C <sub>18</sub> H <sub>38</sub>                                 | 254.5    | 51.1097  | 0.223         | 5.83        |
| 38     | Hypoxanthine                    | C <sub>5</sub> H <sub>4</sub> N <sub>4</sub> O                  | 136.11   | 51.6056  | 0.086         | 23.7        |
| 39     | 12-Hydroxystearic acid          | C <sub>18</sub> H <sub>36</sub> O <sub>3</sub>                  | 300.5    | 51.7046  | 0.070         | 17.9        |
| 40     | Nonadecanoic acid               | C <sub>19</sub> H <sub>38</sub> O <sub>2</sub>                  | 298.5    | 51.9828  | 0.134         | 12.5        |
| 41     | Deoxycholic acid                | C <sub>24</sub> H <sub>40</sub> O <sub>4</sub>                  | 392.6    | 52       | 0.060         | 26.9        |
| 42     | Propionic acid                  | C <sub>3</sub> H <sub>6</sub> O <sub>2</sub>                    | 74.08    | 52.1469  | 0.041         | 8.08        |
| 43     | 1-Heptene                       | C <sub>7</sub> H <sub>14</sub>                                  | 98.19    | 52.7441  | 0.242         | 15.6        |
| 44     | p-Cresol                        | C <sub>7</sub> H <sub>8</sub> O                                 | 108.14   | 53.3247  | 0.073         | 31.8        |

|    |                                  |                                                                 |        |         |       |      |
|----|----------------------------------|-----------------------------------------------------------------|--------|---------|-------|------|
| 45 | l-Isoleucine                     | C <sub>6</sub> H <sub>13</sub> NO <sub>2</sub>                  | 131.17 | 55.235  | 0.053 | 21.8 |
| 46 | Phenazine                        | C <sub>12</sub> H <sub>8</sub> N <sub>2</sub>                   | 180.2  | 55.3391 | 0.048 | 48.1 |
| 47 | sn-Glycero-3-phosphoethanolamine | C <sub>5</sub> H <sub>14</sub> NO <sub>6</sub> P                | 215.14 | 55.6819 | 0.255 | 31.4 |
| 48 | Methyl acetate                   | C <sub>3</sub> H <sub>6</sub> O <sub>2</sub>                    | 74.08  | 56.2061 | 0.062 | 29.2 |
| 49 | Trp-Cys                          | C <sub>14</sub> H <sub>17</sub> N <sub>3</sub> O <sub>3</sub> S | 307.37 | 56.6033 | 0.041 | 36.2 |
| 50 | 5-Methyltetrahydrofolic acid     | C <sub>20</sub> H <sub>25</sub> N <sub>7</sub> O <sub>6</sub>   | 459.5  | 57.2967 | 0.038 | 52.3 |
| 51 | Acetic acid                      | C <sub>2</sub> H <sub>4</sub> O <sub>2</sub>                    | 60.05  | 57.3383 | 4.234 | 18   |

**Supplementary Table 8:** List of common metabolites identified under various treatments.

| Treatment                                  | Total | Metabolites                                                                                                                                                                                                                                                                                                                                                                                                                                                                                                                                                                                                      |
|--------------------------------------------|-------|------------------------------------------------------------------------------------------------------------------------------------------------------------------------------------------------------------------------------------------------------------------------------------------------------------------------------------------------------------------------------------------------------------------------------------------------------------------------------------------------------------------------------------------------------------------------------------------------------------------|
| Control, butyrate, and <i>L. plantarum</i> | 7     | Indole, Homovanillic acid, Octanoic acid, Capric acid, Phenylacetyl glycine, D-Galactose, Nonanoic acid                                                                                                                                                                                                                                                                                                                                                                                                                                                                                                          |
| Control and butyrate                       | 8     | Trp-Ile, Methylmalonic acid, Stearic acid, 2,3-Hexanediol, 2-Methyl-3-hexanol, Urea, L-Saccharopine, Octadecanamide                                                                                                                                                                                                                                                                                                                                                                                                                                                                                              |
| Control and <i>L. plantarum</i>            | 3     | Myristic acid, Met(O)-Val-Arg, Nonadecanoic acid                                                                                                                                                                                                                                                                                                                                                                                                                                                                                                                                                                 |
| Butyrate and <i>L. plantarum</i>           | 5     | Palmitic acid, Methyl propionate, Methyl acetate, Propan-1-one, p-Cresol                                                                                                                                                                                                                                                                                                                                                                                                                                                                                                                                         |
| Control                                    | 26    | Thr-Tyr, Lys-Leu, Riboflavin, Fumaric acid, Phosphoramidon, Indole-3-lactic acid, beta-Lactose, Phe-gly, Gln-Arg-Arg, 2-Furoic acid, Arg-Leu-Lys, Thymidine-5'-phosphate, Cys-Ser, Ile-Pro-Lys, DL-Phenylalanine, Enterodiol, 1,2-Pentanediol, D-Lyxose, Trp-glu, 2-Butanol, Trp-His, Glu-Gly, Isobutylamine, Asn-Asn-Lys, N <sub>2</sub> ,N <sub>2</sub> -Dimethylguanidine, alpha-D-Glucose 1,6-bisphosphate                                                                                                                                                                                                   |
| Butyrate                                   | 19    | 4-Methylbenzoic acid, Ethanol, Acetophenone, Homogentisic acid, Valeric acid, Caproic acid, Hydroxyacetone, Propionamide, Isoleucyl-Arginine, 2-Nitrobutane, N-acetylputrescine, 1-Octanol, alpha-D-Ribofuranose, Thr-Leu, Ethyl heptanoate, Lys-Met, N-acetylglycinamide, Pyrazine, 3-Phenylpropylamine                                                                                                                                                                                                                                                                                                         |
| <i>L. plantarum</i>                        | 36    | 3-Methyl-2-pentenedioic acid, Nonane, Phenazine, DL-Ethionine, Lysine, Indole-3-carboxylic acid, Betaine, Trp-Cys, 1-Heptene, l-Isoleucine, Arginine, Octadecane, 2-Isopropylmalic acid, Leucine, Methylguanidine, Deoxycholic acid, Gln-Glu, 9-Octadecenoic acid, 12-Hydroxystearic acid, Propylamine, Cinnamic acid, Alanine, Uridine, Lys-Cys-Lys, 2-Hydroxypyridine, Pyridine, sn-Glycero-3-phosphoethanolamine, Hypoxanthine, Tyr-Ala, Methyl phenylacetate, Methyl pyrimidine-5-carboxylate, Methanesulfonic acid, 5-Methyltetrahydrofolic acid, Methyl 2-methylprop-2-enoate, Propionic acid, Acetic acid |

**Supplementary Table 9:** Metabolite class enrichment in Control.

|  | <b>Metabolite Set</b>                     | <b>Total</b> | <b>Hits</b> | <b>Expect</b> | <b>P value</b> | <b>Holm P</b> | <b>FDR</b> |
|--|-------------------------------------------|--------------|-------------|---------------|----------------|---------------|------------|
|  | Amino acids, peptides, and analogues      | 3220         | 13          | 0.601         | 1.41E-14       | 1.26E-11      | 1.26E-11   |
|  | Fatty acids and conjugates                | 941          | 6           | 0.175         | 2.32E-8        | 2.07E-5       | 1.03E-5    |
|  | Dicarboxylic acids and derivatives        | 75           | 2           | 0.014         | 9.32E-5        | 0.0827        | 0.0276     |
|  | Alloxazines and isoalloxazines            | 8            | 1           | 0.00149       | 0.00149        | 1.0           | 0.304      |
|  | Purine nucleosides                        | 11           | 1           | 0.00205       | 0.00205        | 1.0           | 0.304      |
|  | Dibenzylbutanediol lignans                | 11           | 1           | 0.00205       | 0.00205        | 1.0           | 0.304      |
|  | Carbohydrates and carbohydrate conjugates | 1600         | 3           | 0.297         | 0.00329        | 1.0           | 0.368      |
|  | Pyrimidine deoxyribonucleotides           | 19           | 1           | 0.00354       | 0.00354        | 1.0           | 0.368      |
|  | Furoic acid and derivatives               | 20           | 1           | 0.00373       | 0.00372        | 1.0           | 0.368      |
|  | Carboximidic acids                        | 27           | 1           | 0.00504       | 0.00502        | 1.0           | 0.447      |
|  | Ureas                                     | 37           | 1           | 0.0069        | 0.00688        | 1.0           | 0.556      |
|  | Indolyl carboxylic acids and derivatives  | 55           | 1           | 0.0103        | 0.0102         | 1.0           | 0.757      |
|  | Carbonyl compounds                        | 975          | 2           | 0.182         | 0.0143         | 1.0           | 0.982      |
|  | Indoles                                   | 133          | 1           | 0.0248        | 0.0245         | 1.0           | 1.0        |
|  | Methoxyphenols                            | 137          | 1           | 0.0255        | 0.0252         | 1.0           | 1.0        |
|  | Alcohols and polyols                      | 309          | 1           | 0.0576        | 0.056          | 1.0           | 1.0        |
|  | Amines                                    | 350          | 1           | 0.0653        | 0.0632         | 1.0           | 1.0        |

**Supplementary Table 10:** Metabolite class enrichment in Butyrate treatment.

|  | <b>Metabolite Set</b>                     | <b>Total</b> | <b>Hits</b> | <b>Expect</b> | <b>P value</b> | <b>Holm P</b> | <b>FDR</b> |
|--|-------------------------------------------|--------------|-------------|---------------|----------------|---------------|------------|
|  | Fatty acids and conjugates                | 941          | 7           | 0.166         | 3.26E-10       | 2.9E-7        | 2.9E-7     |
|  | Carbonyl compounds                        | 975          | 5           | 0.172         | 8.28E-7        | 7.36E-4       | 3.68E-4    |
|  | Amino acids, peptides, and analogues      | 3220         | 7           | 0.569         | 1.37E-6        | 0.00122       | 4.07E-4    |
|  | Carboximidic acids                        | 27           | 2           | 0.00477       | 1.06E-5        | 0.00942       | 0.00236    |
|  | Carboxylic acid derivatives               | 236          | 2           | 0.0417        | 8.2E-4         | 0.726         | 0.146      |
|  | Phenylacetic acids                        | 8            | 1           | 0.00141       | 0.00141        | 1.0           | 0.21       |
|  | Cresols                                   | 23           | 1           | 0.00406       | 0.00406        | 1.0           | 0.516      |
|  | Ureas                                     | 37           | 1           | 0.00654       | 0.00652        | 1.0           | 0.725      |
|  | Dicarboxylic acids and derivatives        | 75           | 1           | 0.0133        | 0.0132         | 1.0           | 1.0        |
|  | Pyrazines                                 | 117          | 1           | 0.0207        | 0.0205         | 1.0           | 1.0        |
|  | Indoles                                   | 133          | 1           | 0.0235        | 0.0232         | 1.0           | 1.0        |
|  | Methoxyphenols                            | 137          | 1           | 0.0242        | 0.0239         | 1.0           | 1.0        |
|  | Carbohydrates and carbohydrate conjugates | 1600         | 2           | 0.282         | 0.0324         | 1.0           | 1.0        |
|  | Alcohols and polyols                      | 309          | 1           | 0.0546        | 0.0532         | 1.0           | 1.0        |
|  | Fatty alcohols                            | 535          | 1           | 0.0945        | 0.0903         | 1.0           | 1.0        |
|  | Benzoic acids and derivatives             | 624          | 1           | 0.11          | 0.105          | 1.0           | 1.0        |
|  | Fatty acid esters                         | 1650         | 1           | 0.291         | 0.254          | 1.0           | 1.0        |

**Supplementary Table 11:** Metabolite class enrichment in *L. plantarum* treatment.

|  | <b>Metabolite Set</b>                  | <b>Total</b> | <b>Hits</b> | <b>Expect</b> | <b>P value</b> | <b>Holm P</b> | <b>FDR</b> |
|--|----------------------------------------|--------------|-------------|---------------|----------------|---------------|------------|
|  | Fatty acids and conjugates             | 941          | 10          | 0.217         | 1.87E-14       | 1.66E-11      | 1.66E-11   |
|  | Amino acids, peptides, and analogues   | 3220         | 11          | 0.743         | 1.57E-10       | 1.39E-7       | 6.98E-8    |
|  | Carboxylic acid derivatives            | 236          | 3           | 0.0544        | 2.4E-5         | 0.0213        | 0.00711    |
|  | Carboxylic acids                       | 39           | 2           | 0.009         | 3.84E-5        | 0.034         | 0.00854    |
|  | Alkanes                                | 105          | 2           | 0.0242        | 2.8E-4         | 0.248         | 0.0498     |
|  | Pyrimidine ribonucleosides             | 5            | 1           | 0.00115       | 0.00115        | 1.0           | 0.171      |
|  | Cinnamic acids                         | 8            | 1           | 0.00185       | 0.00184        | 1.0           | 0.231      |
|  | Pyridines                              | 9            | 1           | 0.00208       | 0.00207        | 1.0           | 0.231      |
|  | Cresols                                | 23           | 1           | 0.00531       | 0.00529        | 1.0           | 0.523      |
|  | Guanidines                             | 31           | 1           | 0.00715       | 0.00713        | 1.0           | 0.634      |
|  | Indolecarboxylic acids and derivatives | 45           | 1           | 0.0104        | 0.0103         | 1.0           | 0.754      |
|  | Unsaturated aliphatic hydrocarbons     | 47           | 1           | 0.0108        | 0.0108         | 1.0           | 0.754      |
|  | Organosulfonic acids and derivatives   | 48           | 1           | 0.0111        | 0.011          | 1.0           | 0.754      |
|  | Pterins and derivatives                | 77           | 1           | 0.0178        | 0.0176         | 1.0           | 1.0        |
|  | Hydropyridines                         | 95           | 1           | 0.0219        | 0.0217         | 1.0           | 1.0        |
|  | Indoles                                | 133          | 1           | 0.0307        | 0.0302         | 1.0           | 1.0        |
|  | Methoxyphenols                         | 137          | 1           | 0.0316        | 0.0311         | 1.0           | 1.0        |
|  | Purines and purine derivatives         | 196          | 1           | 0.0452        | 0.0442         | 1.0           | 1.0        |
|  | Benzodiazines                          | 200          | 1           | 0.0461        | 0.0451         | 1.0           | 1.0        |
|  | Bile acids, alcohols and derivatives   | 273          | 1           | 0.063         | 0.0611         | 1.0           | 1.0        |

|  |                                           |      |   |        |        |     |     |
|--|-------------------------------------------|------|---|--------|--------|-----|-----|
|  | Amines                                    | 350  | 1 | 0.0807 | 0.0776 | 1.0 | 1.0 |
|  | Carbonyl compounds                        | 975  | 1 | 0.225  | 0.202  | 1.0 | 1.0 |
|  | Carbohydrates and carbohydrate conjugates | 1600 | 1 | 0.368  | 0.309  | 1.0 | 1.0 |
|  | Glycerophosphoethanolamines               | 3080 | 1 | 0.711  | 0.512  | 1.0 | 1.0 |

**Supplementary Table 12:** List of common metabolic classes identified under various treatments.

| <b>Treatment</b>                           | <b>Total</b> | <b>Metabolite class</b>                                                                                                                                                                                                                                                                                                                                                   |
|--------------------------------------------|--------------|---------------------------------------------------------------------------------------------------------------------------------------------------------------------------------------------------------------------------------------------------------------------------------------------------------------------------------------------------------------------------|
| Control, butyrate, and <i>L. plantarum</i> | 6            | Carbonyl compounds, Indoles, Methoxyphenols, Fatty acids and conjugates, Amino acids, peptides, and analogues, Carbohydrates and carbohydrate conjugates                                                                                                                                                                                                                  |
| Control and butyrate                       | 4            | Alcohols and polyols, Ureas, Carboximidic acids, Dicarboxylic acids and derivatives                                                                                                                                                                                                                                                                                       |
| Control and <i>L. plantarum</i>            | 1            | Amines                                                                                                                                                                                                                                                                                                                                                                    |
| Butyrate and <i>L. plantarum</i>           | 2            | Cresols, Carboxylic acid derivatives                                                                                                                                                                                                                                                                                                                                      |
| Control                                    | 6            | Pyrimidine deoxyribonucleotides, Alloxazines and isoalloxazines, Dibenzylbutanediol lignans, Purine nucleosides, Indolyl carboxylic acids and derivatives, Furoic acid and derivatives                                                                                                                                                                                    |
| Butyrate                                   | 5            | Fatty alcohols, Phenylacetic acids, Benzoic acids and derivatives, Fatty acid esters, Pyrazines                                                                                                                                                                                                                                                                           |
| <i>L. plantarum</i>                        | 15           | Unsaturated aliphatic hydrocarbons, Hydropyridines, Pyrimidine ribonucleosides, Carboxylic acids, Organosulfonic acids and derivatives, Cinnamic acids, Alkanes, Indolecarboxylic acids and derivatives, Benzodiazines, Pyridines, Guanidines, Bile acids, alcohols and derivatives, Purines and purine derivatives, Glycerophosphoethanolamines, Pterins and derivatives |

**Supplementary Table 13:** List of metabolic pathways enriched in Control.

| Pathway Name                                        | Match Status | p       | -log(p)  | Holm p | FDR     | Impact  |
|-----------------------------------------------------|--------------|---------|----------|--------|---------|---------|
| Lipoic acid metabolism                              | 1/28         | 0.57354 | 0.24144  | 1.0    | 0.96487 | 0.02703 |
| Phenylalanine, tyrosine and tryptophan biosynthesis | 1/23         | 0.57432 | 0.24085  | 1.0    | 0.96487 | 0.04167 |
| Tryptophan metabolism                               | 1/10         | 0.57432 | 0.24085  | 1.0    | 0.96487 | 0.0     |
| Galactose metabolism                                | 1/39         | 0.65855 | 0.18141  | 1.0    | 0.96487 | 0.02439 |
| Riboflavin metabolism                               | 1/17         | 0.74243 | 0.12935  | 1.0    | 0.96487 | 0.11111 |
| D-Amino acid metabolism                             | 1/25         | 0.77839 | 0.1088   | 1.0    | 0.96487 | 0.05882 |
| Purine metabolism                                   | 1/76         | 0.80318 | 0.095184 | 1.0    | 0.96487 | 0.0     |
| Phenylalanine metabolism                            | 2/35         | 0.83768 | 0.076924 | 1.0    | 0.96487 | 0.02857 |
| Pyruvate metabolism                                 | 1/27         | 0.85046 | 0.070348 | 1.0    | 0.96487 | 0.02381 |
| Citrate cycle (TCA cycle)                           | 1/20         | 0.85046 | 0.070348 | 1.0    | 0.96487 | 0.0     |
| Arginine biosynthesis                               | 1/16         | 0.85046 | 0.070348 | 1.0    | 0.96487 | 0.0     |
| Alanine, aspartate and glutamate metabolism         | 1/22         | 0.85046 | 0.070348 | 1.0    | 0.96487 | 0.0     |
| Butanoate metabolism                                | 1/18         | 0.85046 | 0.070348 | 1.0    | 0.96487 | 0.0     |
| Other carbon fixation pathways                      | 1/24         | 0.85046 | 0.070348 | 1.0    | 0.96487 | 0.0     |
| Pyrimidine metabolism                               | 1/51         | 0.96487 | 0.015533 | 1.0    | 0.96487 | 0.04225 |
| One carbon pool by folate                           | 1/20         | 0.96487 | 0.015533 | 1.0    | 0.96487 | 0.0     |

**Supplementary Table 14:** List of metabolic pathways enriched in Butyrate treatment.

| Pathway Name                | Match Status | p       | -log(p) | Holm p | FDR     | Impact  |
|-----------------------------|--------------|---------|---------|--------|---------|---------|
| Lipoic acid metabolism      | 1/28         | 0.57356 | 0.24142 | 1.0    | 0.78637 | 0.02703 |
| Phenylalanine, tyrosine and | 1/23         | 0.57409 | 0.24102 | 1.0    | 0.78637 | 0.04167 |

|                                         |      |         |          |     |         |         |
|-----------------------------------------|------|---------|----------|-----|---------|---------|
| tryptophan biosynthesis                 |      |         |          |     |         |         |
| Tryptophan metabolism                   | 1/10 | 0.57409 | 0.24102  | 1.0 | 0.78637 | 0.0     |
| Arginine and proline metabolism         | 1/29 | 0.63738 | 0.1956   | 1.0 | 0.78637 | 0.0     |
| Fatty acid degradation                  | 1/41 | 0.65107 | 0.18637  | 1.0 | 0.78637 | 0.02083 |
| Fatty acid biosynthesis                 | 1/46 | 0.65107 | 0.18637  | 1.0 | 0.78637 | 0.01923 |
| Biosynthesis of unsaturated fatty acids | 1/2  | 0.65107 | 0.18637  | 1.0 | 0.78637 | 0.0     |
| Purine metabolism                       | 2/76 | 0.65971 | 0.18065  | 1.0 | 0.78637 | 0.01124 |
| Propanoate metabolism                   | 1/26 | 0.68808 | 0.16236  | 1.0 | 0.78637 | 0.04167 |
| Pentose phosphate pathway               | 1/26 | 0.71486 | 0.14578  | 1.0 | 0.78637 | 0.02941 |
| Glycolysis or Gluconeogenesis           | 1/29 | 0.72588 | 0.13913  | 1.0 | 0.78637 | 0.02703 |
| Pyruvate metabolism                     | 1/27 | 0.72588 | 0.13913  | 1.0 | 0.78637 | 0.02381 |
| Galactose metabolism                    | 1/39 | 0.80319 | 0.095181 | 1.0 | 0.80319 | 0.02439 |

**Supplementary Table 15:** List of metabolic pathways enriched in *L. plantarum* treatment.

| <b>Pathway Name</b>                                 | <b>Match Status</b> | <b>p</b> | <b>-log(p)</b> | <b>Holm p</b> | <b>FDR</b> | <b>Impact</b> |
|-----------------------------------------------------|---------------------|----------|----------------|---------------|------------|---------------|
| Lipoic acid metabolism                              | 1/28                | 0.57354  | 0.24144        | 1.0           | 0.98507    | 0.02703       |
| Taurine and hypotaurine metabolism                  | 1/10                | 0.57529  | 0.24011        | 1.0           | 0.98507    | 0.14286       |
| Methane metabolism                                  | 1/26                | 0.57529  | 0.24011        | 1.0           | 0.98507    | 0.08          |
| Glyoxylate and dicarboxylate metabolism             | 1/37                | 0.57529  | 0.24011        | 1.0           | 0.98507    | 0.02941       |
| Glycolysis or Gluconeogenesis                       | 1/29                | 0.57529  | 0.24011        | 1.0           | 0.98507    | 0.02703       |
| Phenylalanine, tyrosine and tryptophan biosynthesis | 1/23                | 0.57847  | 0.23772        | 1.0           | 0.98507    | 0.04167       |
| Tryptophan metabolism                               | 1/10                | 0.57847  | 0.23772        | 1.0           | 0.98507    | 0.0           |
| Fatty acid degradation                              | 1/41                | 0.59278  | 0.22711        | 1.0           | 0.98507    | 0.02083       |

|                                             |      |         |           |     |         |         |
|---------------------------------------------|------|---------|-----------|-----|---------|---------|
| Fatty acid biosynthesis                     | 1/46 | 0.59278 | 0.22711   | 1.0 | 0.98507 | 0.01923 |
| Biosynthesis of unsaturated fatty acids     | 1/2  | 0.59278 | 0.22711   | 1.0 | 0.98507 | 0.0     |
| Pyruvate metabolism                         | 2/27 | 0.60763 | 0.21636   | 1.0 | 0.98507 | 0.04762 |
| Sulfur metabolism                           | 2/20 | 0.65633 | 0.18288   | 1.0 | 0.98507 | 0.04545 |
| Purine metabolism                           | 1/76 | 0.67058 | 0.17355   | 1.0 | 0.98507 | 0.02247 |
| Other carbon fixation pathways              | 2/24 | 0.67734 | 0.1692    | 1.0 | 0.98507 | 0.08333 |
| Galactose metabolism                        | 1/39 | 0.68086 | 0.16694   | 1.0 | 0.98507 | 0.02439 |
| Valine, leucine and isoleucine biosynthesis | 3/22 | 0.70389 | 0.1525    | 1.0 | 0.98507 | 0.1     |
| Valine, leucine and isoleucine degradation  | 2/22 | 0.73896 | 0.13138   | 1.0 | 0.98507 | 0.15384 |
| Pyrimidine metabolism                       | 1/51 | 0.78139 | 0.10713   | 1.0 | 0.98507 | 0.02817 |
| Propanoate metabolism                       | 1/26 | 0.79641 | 0.098862  | 1.0 | 0.98507 | 0.04167 |
| Alanine, aspartate and glutamate metabolism | 1/22 | 0.83331 | 0.079193  | 1.0 | 0.98507 | 0.04    |
| Selenocompound metabolism                   | 1/15 | 0.83331 | 0.079193  | 1.0 | 0.98507 | 0.0     |
| One carbon pool by folate                   | 2/20 | 0.88557 | 0.052777  | 1.0 | 0.98507 | 0.06061 |
| Arginine and proline metabolism             | 1/29 | 0.892   | 0.049636  | 1.0 | 0.98507 | 0.07407 |
| Arginine biosynthesis                       | 1/16 | 0.892   | 0.049636  | 1.0 | 0.98507 | 0.0     |
| D-Amino acid metabolism                     | 3/25 | 0.89264 | 0.049323  | 1.0 | 0.98507 | 0.17646 |
| Glycine, serine and threonine metabolism    | 1/33 | 0.94417 | 0.024948  | 1.0 | 0.98507 | 0.0     |
| Lysine degradation                          | 1/22 | 0.98507 | 0.0065347 | 1.0 | 0.98507 | 0.10526 |
| Lysine biosynthesis                         | 1/13 | 0.98507 | 0.0065347 | 1.0 | 0.98507 | 0.0     |

**Supplementary Table 16:** List of common metabolic pathways identified under various treatments.

| <b>Treatment</b>                           | <b>Total</b> | <b>Metabolic pathways</b>                                                                                                                                                                                                                                                                                                 |
|--------------------------------------------|--------------|---------------------------------------------------------------------------------------------------------------------------------------------------------------------------------------------------------------------------------------------------------------------------------------------------------------------------|
| Control, butyrate, and <i>L. plantarum</i> | 6            | Phenylalanine, tyrosine and tryptophan biosynthesis, Lipoic acid metabolism, Pyruvate metabolism, Purine metabolism, Galactose metabolism, Tryptophan metabolism                                                                                                                                                          |
| Control and <i>L. plantarum</i>            | 6            | Alanine, aspartate and glutamate metabolism, Pyrimidine metabolism, One carbon pool by folate, D-Amino acid metabolism, Arginine biosynthesis, Other carbon fixation pathways                                                                                                                                             |
| Butyrate and <i>L. plantarum</i>           | 6            | Biosynthesis of unsaturated fatty acids, Fatty acid degradation, Glycolysis or Gluconeogenesis, Propanoate metabolism, Fatty acid biosynthesis, Arginine and proline metabolism                                                                                                                                           |
| Control                                    | 4            | Citrate cycle (TCA cycle), Phenylalanine metabolism, Butanoate metabolism, Riboflavin metabolism                                                                                                                                                                                                                          |
| Butyrate                                   | 1            | Pentose phosphate pathway                                                                                                                                                                                                                                                                                                 |
| <i>L. plantarum</i>                        | 10           | Glyoxylate and dicarboxylate metabolism, Selenocompound metabolism, Taurine and hypotaurine metabolism, Methane metabolism, Valine, leucine and isoleucine biosynthesis, Sulfur metabolism, Lysine biosynthesis, Lysine degradation, Valine, leucine and isoleucine degradation, Glycine, serine and threonine metabolism |

**Supplementary Figure 1.** Comparison of gut microbial functions between the butyrate and *L. plantarum* treated groups.

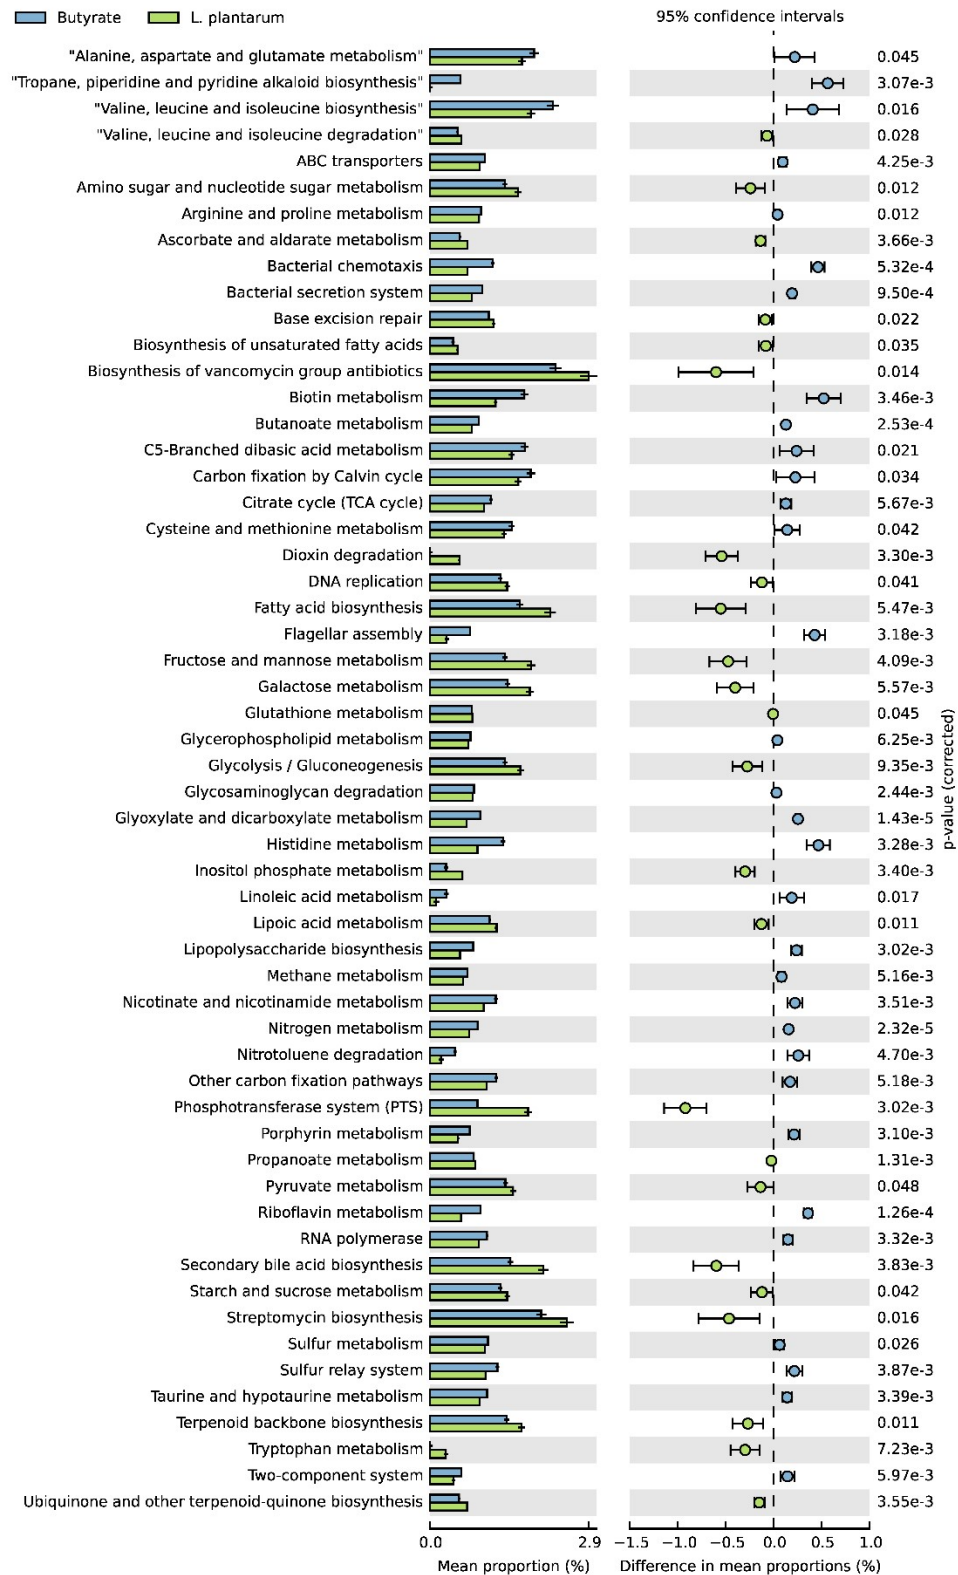

Supplement: d5fo04976h1.pdf [file d5fo04976h1.pdf]
